# Supplementary material for: Therapeutic Helminth Infection of Macaques with Idiopathic Chronic Diarrhea Alters the Inflammatory Signature and Mucosal Microbiota of the Colon
Source: PubMed Central journal article supplement (PMC3499566; doi:10.1371/journal.ppat.1003000), 2012-11-15
Supplement: ppat.1003000.s009.pdf [file ppat.1003000.s009.pdf]

Table S2

| Description                                                                                                                                                                                 | Fold | FDR   |
|---------------------------------------------------------------------------------------------------------------------------------------------------------------------------------------------|------|-------|
| acyl-CoA synthetase bubblemegum family member 1 [Source:HGNC Symbol;Acc:29567] [ENSMMUT00000016586]                                                                                         | 6.00 | 0.174 |
| interleukin 9 receptor [Source:HGNC Symbol;Acc:6030] [ENSMMUT00000002856]                                                                                                                   | 5.36 | 0.280 |
| PREDICTED: Macaca mulatta arachidonate 5-lipoxygenase, transcript variant 1 (ALOX5), mRNA [XM_001102354]                                                                                    | 5.13 | 0.174 |
| arachidonate 15-lipoxygenase [Source:HGNC Symbol;Acc:433] [ENSMMUT00000042388]                                                                                                              | 5.13 | 0.174 |
| carboxypeptidase A3 (mast cell) [Source:HGNC Symbol;Acc:2298] [ENSMMUT00000007772]                                                                                                          | 4.85 | 0.273 |
| membrane-spanning 4-domains, subfamily A, member 2 (Fc fragment of IgE, high affinity I, receptor for; beta polypeptide) [Source:HGNC Symbol;Acc:7316] [ENSMMUT00000018994]                 | 4.71 | 0.174 |
| arachidonate 5-lipoxygenase [Source:HGNC Symbol;Acc:435] [ENSMMUT00000018848]                                                                                                               | 4.68 | 0.202 |
| Putative uncharacterized protein C1orf150 [Source:UniProtKB/Swiss-Prot;Acc:Q5JQS6] [ENSMMUT00000044542]                                                                                     | 4.62 | 0.211 |
| carboxypeptidase A3 (mast cell) [Source:HGNC Symbol;Acc:2298] [ENSMMUT00000007772]                                                                                                          | 4.49 | 0.175 |
| PREDICTED: Macaca mulatta mastin-like (LOC722431), mRNA [XM_001118581]                                                                                                                      | 4.46 | 0.174 |
| tenascin C [Source:HGNC Symbol;Acc:5318] [ENSMMUT00000004742]                                                                                                                               | 4.38 | 0.174 |
| baculoviral IAP repeat-containing 7 [Source:HGNC Symbol;Acc:13702] [ENSMMUT00000012902]                                                                                                     | 3.55 | 0.174 |
| leukotriene C4 synthase [Source:HGNC Symbol;Acc:6719] [ENSMMUT00000017351]                                                                                                                  | 3.53 | 0.174 |
| acyl-CoA synthetase bubblemegum family member 1 [Source:HGNC Symbol;Acc:29567] [ENSMMUT00000016586]                                                                                         | 3.45 | 0.174 |
| tenascin C [Source:HGNC Symbol;Acc:5318] [ENSMMUT00000004742]                                                                                                                               | 3.40 | 0.288 |
| PREDICTED: Macaca mulatta dermatopontin-like (LOC700181), mRNA [XM_002802062]                                                                                                               | 3.36 | 0.273 |
| ghrelin [Source:RefSeq peptide;Acc:NP_001028075] [ENSMMUT00000028003]                                                                                                                       | 3.27 | 0.213 |
| G protein-coupled receptor 44 [Source:HGNC Symbol;Acc:4502] [ENSMMUT00000000025]                                                                                                            | 3.14 | 0.248 |
| Fibronectin 1 Fragment [Source:UniProtKB/TrEMBL;Acc:Q5MD86] [ENSMMUT00000017323]                                                                                                            | 2.98 | 0.174 |
| Fibronectin 1 Fragment [Source:UniProtKB/TrEMBL;Acc:Q5MD86] [ENSMMUT00000017323]                                                                                                            | 2.96 | 0.174 |
| PREDICTED: Macaca mulatta collagen alpha-1(XIII) chain-like (LOC716986), mRNA [XM_001108092]                                                                                                | 2.95 | 0.175 |
| arachidonate 5-lipoxygenase [Source:HGNC Symbol;Acc:435] [ENSMMUT00000018848]                                                                                                               | 2.94 | 0.174 |
| PREDICTED: Macaca mulatta mastin-like (LOC722427), mRNA [XM_001118577]                                                                                                                      | 2.88 | 0.174 |
| dermatopontin [Source:HGNC Symbol;Acc:3011] [ENSMMUT00000004157]                                                                                                                            | 2.72 | 0.174 |
| PREDICTED: Macaca mulatta protein FAM38A-like (LOC72206), mRNA [XM_002800862]                                                                                                               | 2.59 | 0.174 |
| myosin binding protein H [Source:HGNC Symbol;Acc:7552] [ENSMMUT00000012176]                                                                                                                 | 2.54 | 0.279 |
| prostaglandin-endoperoxide synthase 1 (prostaglandin G/H synthase and cyclooxygenase) [Source:HGNC Symbol;Acc:9604] [ENSMMUT00000018079]                                                    | 2.50 | 0.273 |
| insulin-like growth factor binding protein 6 [Source:HGNC Symbol;Acc:5475] [ENSMMUT00000028608]                                                                                             | 2.42 | 0.174 |
| PREDICTED: Macaca mulatta collagen, type III, alpha 1 (COL3A1), mRNA [XM_001105968]                                                                                                         | 2.39 | 0.260 |
| CD320 molecule [Source:HGNC Symbol;Acc:16692] [ENSMMUT00000023457]                                                                                                                          | 2.33 | 0.246 |
| v-kit Hardy-Zuckerman 4 feline sarcoma viral oncogene homolog [Source:HGNC Symbol;Acc:6342] [ENSMMUT00000004330]                                                                            | 2.17 | 0.174 |
| ILLUMIGEN_MCQ_32942 Katze_MMBR Macaca mulatta cDNA clone IBIUW:12912 5' similar to Bases 1 to 238 highly similar to human IGFBP6 (Hs.274313), mRNA sequence [CN803406]                      | 2.09 | 0.175 |
| PREDICTED: Macaca mulatta cysteine-rich secretory protein LCCL domain containing 2, transcript variant 3 (CRISPLD2), mRNA [XM_001112988]                                                    | 2.02 | 0.193 |
| PREDICTED: Macaca mulatta prostaglandin-endoperoxide synthase 1, transcript variant 6 (PTGS1), mRNA [XM_001088270]                                                                          | 2.01 | 0.280 |
| Macaca mulatta collagen type III alpha 1 mRNA, 3' UTR. [FJ932748]                                                                                                                           | 1.98 | 0.273 |
| spondin 1, extracellular matrix protein [Source:HGNC Symbol;Acc:11252] [ENSMMUT00000030829]                                                                                                 | 1.83 | 0.288 |
| early B-cell factor 4 [Source:HGNC Symbol;Acc:29278] [ENSMMUT00000044592]                                                                                                                   | 1.82 | 0.174 |
| ArfGAP with GTPase domain, ankyrin repeat and PH domain 1 [Source:HGNC Symbol;Acc:16922] [ENSMMUT00000013063]                                                                               | 1.80 | 0.174 |
| zinc finger protein 620 [Source:HGNC Symbol;Acc:28742] [ENSMMUT00000022433]                                                                                                                 | 1.76 | 0.279 |
| Macaca mulatta carbonyl reductase 3 (CBR3), mRNA [NM_001193746]                                                                                                                             | 1.68 | 0.267 |
| insulin-like growth factor 1 receptor [Source:HGNC Symbol;Acc:5465] [ENSMMUT00000017236]                                                                                                    | 1.43 | 0.282 |
| F-box protein 6 [Source:HGNC Symbol;Acc:13585] [ENSMMUT00000047575]                                                                                                                         | 0.65 | 0.273 |
| Macaca mulatta haloacid dehalogenase-like hydrolase domain containing 3 (HDHD3), mRNA [NM_001194198]                                                                                        | 0.56 | 0.271 |
| signal transducer and activator of transcription 1, 91kDa [Source:HGNC Symbol;Acc:11362] [ENSMMUT00000007897]                                                                               | 0.51 | 0.174 |
| ubiquitin-conjugating enzyme E2L 6 [Source:HGNC Symbol;Acc:12490] [ENSMMUT00000001886]                                                                                                      | 0.49 | 0.174 |
| CD5 molecule-like [Source:HGNC Symbol;Acc:1690] [ENSMMUT000000027876]                                                                                                                       | 0.48 | 0.287 |
| PREDICTED: Macaca mulatta ubiquitin [XR_012726]                                                                                                                                             | 0.47 | 0.175 |
| retinoic acid receptor responder (tazarotene induced) 3 [Source:HGNC Symbol;Acc:9869] [ENSMMUT000000025736]                                                                                 | 0.45 | 0.280 |
| PREDICTED: Macaca mulatta thymidine phosphorylase, transcript variant 4 (TYMP), mRNA [XM_001112945]                                                                                         | 0.45 | 0.288 |
| G protein-coupled receptor 128 [Source:HGNC Symbol;Acc:19241] [ENSMMUT00000004053]                                                                                                          | 0.43 | 0.174 |
| PREDICTED: Macaca mulatta retinoic acid receptor responder protein 3-like (LOC722189), mRNA [XM_001118373]                                                                                  | 0.41 | 0.174 |
| PREDICTED: Macaca mulatta hypothetical LOC703547, transcript variant 1 (LOC703547), mRNA [XM_001099113]                                                                                     | 0.40 | 0.288 |
| PREDICTED: Macaca mulatta hypothetical LOC703547, transcript variant 1 (LOC703547), mRNA [XM_001099113]                                                                                     | 0.40 | 0.288 |
| PREDICTED: Macaca mulatta guanylate-binding protein 6-like (LOC695158), miscRNA [XR_091839]                                                                                                 | 0.39 | 0.174 |
| CD8a molecule [Source:HGNC Symbol;Acc:1706] [ENSMMUT00000004986]                                                                                                                            | 0.39 | 0.288 |
| Macaca mulatta indoleamine 2,3-dioxygenase 1 (IDO1), mRNA [NM_001077483]                                                                                                                    | 0.39 | 0.174 |
| Macaca mulatta indoleamine 2,3-dioxygenase 1 (IDO1), mRNA [NM_001077483]                                                                                                                    | 0.38 | 0.273 |
| tubulointerstitial nephritis antigen [Source:HGNC Symbol;Acc:14599] [ENSMMUT00000017935]                                                                                                    | 0.32 | 0.174 |
| scielin [Source:HGNC Symbol;Acc:10573] [ENSMMUT00000000066]                                                                                                                                 | 0.30 | 0.282 |
| PREDICTED: Macaca mulatta thymidine phosphorylase, transcript variant 4 (TYMP), mRNA [XM_001112945]                                                                                         | 0.29 | 0.288 |
| ring finger protein 182 [Source:HGNC Symbol;Acc:28522] [ENSMMUT00000041378]                                                                                                                 | 0.27 | 0.202 |
| C-X-C motif chemokine 10 Precursor [Small-inducible cytokine B10](10 kDa interferon-gamma-induced protein)(Gamma-IP10)(IP-10) [Source:UniProtKB/Swiss-Prot;Acc:Q8MIZ1] [ENSMMUT00000029391] | 0.27 | 0.174 |
| Macaca mulatta chemokine (C-X-C motif) ligand 10 (CXCL10), mRNA [NM_001032892]                                                                                                              | 0.24 | 0.174 |
| tumor protein p63 regulated 1 [Source:HGNC Symbol;Acc:24759] [ENSMMUT00000009593]                                                                                                           | 0.23 | 0.174 |
| PREDICTED: Macaca mulatta hephaestin-like 1 (HEPHL1), mRNA [XM_001086917]                                                                                                                   | 0.22 | 0.175 |
| Macaca mulatta chemokine (C-X-C motif) ligand 11 (CXCL11), mRNA [NM_001032950]                                                                                                              | 0.19 | 0.174 |
| small inducible cytokine B11 [Source:RefSeq peptide;Acc:NP_001028122] [ENSMMUT00000029393]                                                                                                  | 0.16 | 0.174 |
